# Supplementary figures and images for: Multiple introductions of highly pathogenic avian influenza H5N1 viruses into Bangladesh
Source: PubMed Central journal article supplement — Emerg Microbes Infect. 2014 Feb 12;3(2):e11–. doi: 10.1038/emi.2014.11 (PMC3944120; doi:10.1038/emi.2014.11), 2014-02-12

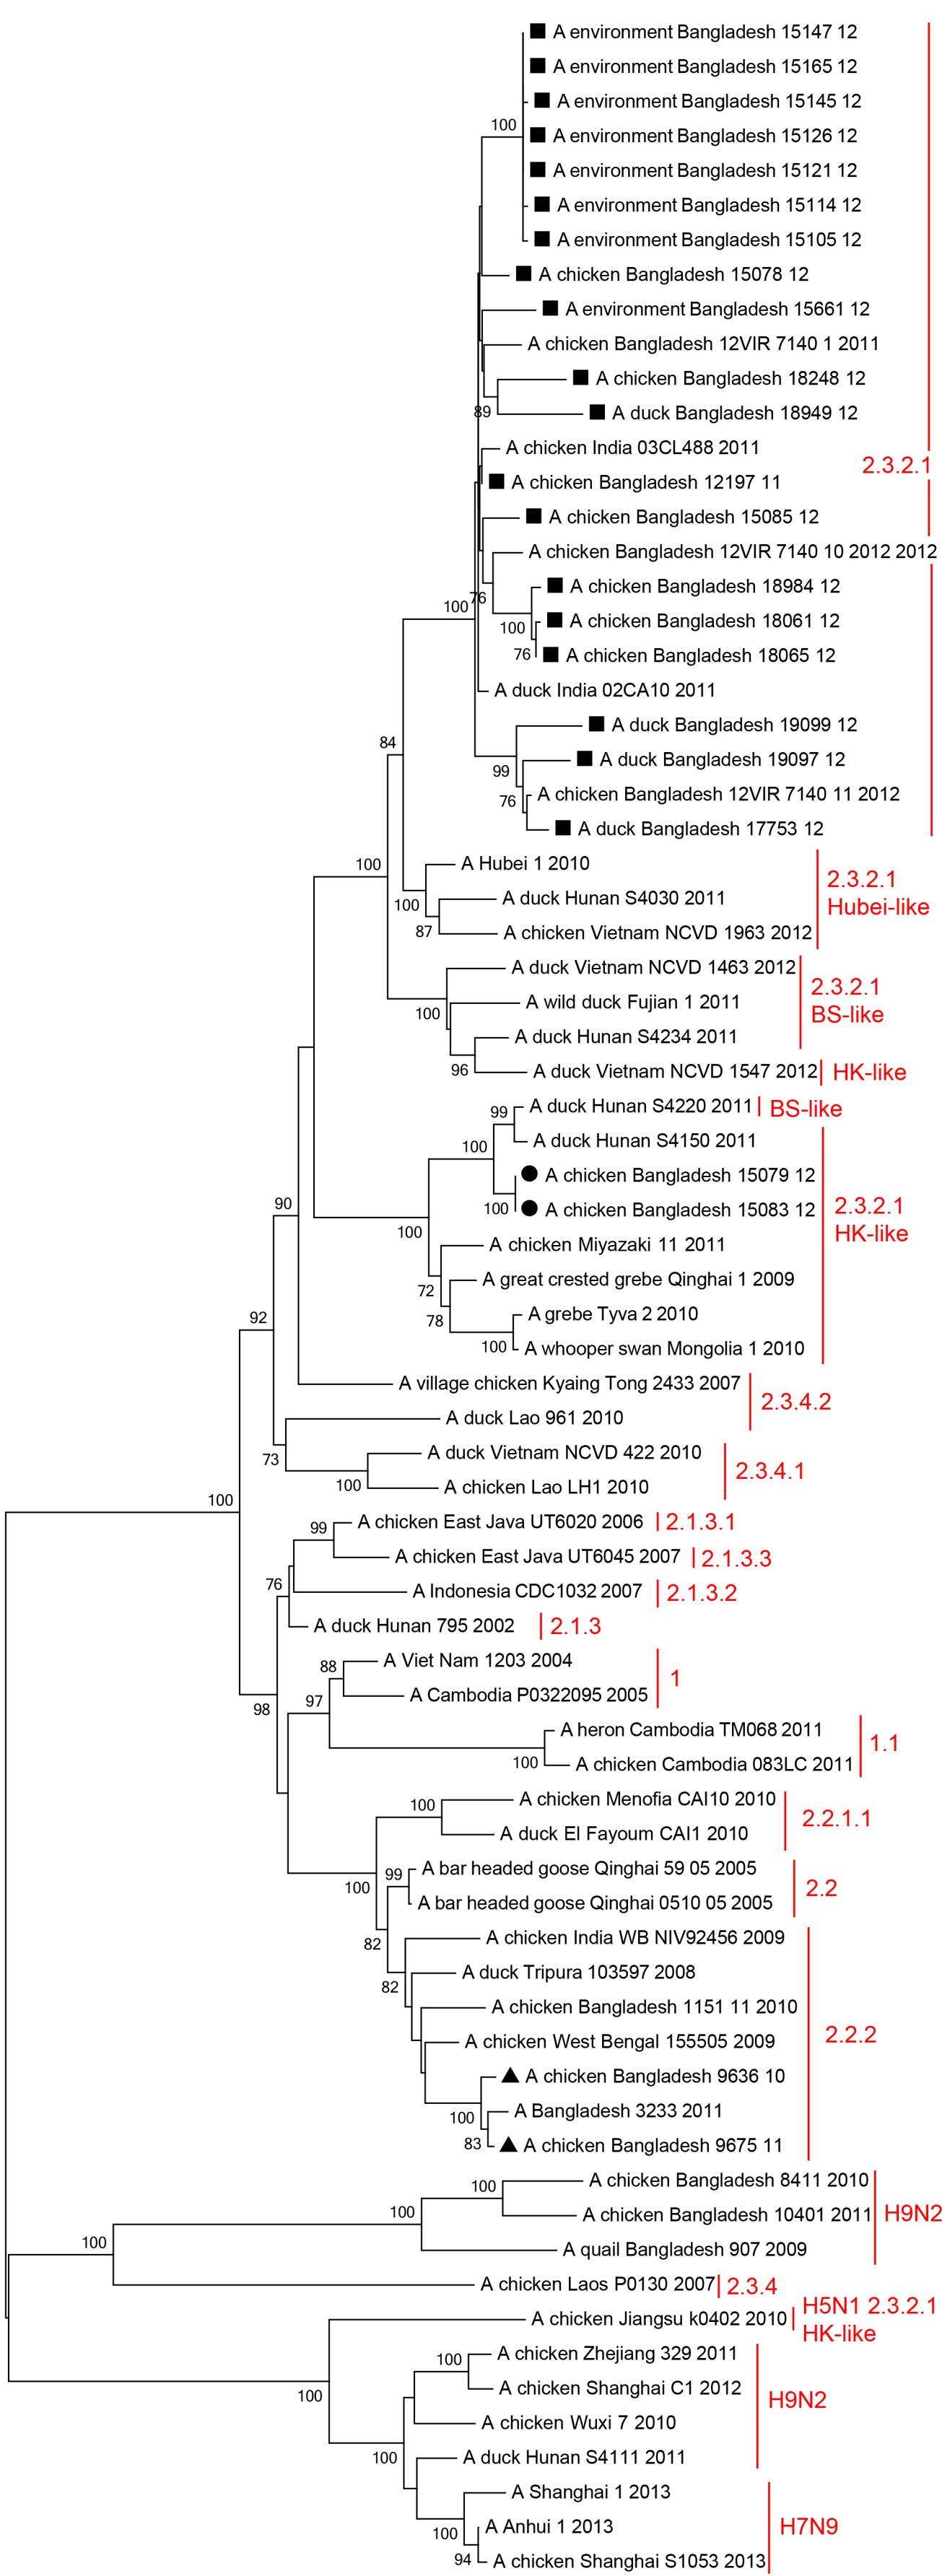

Supplement: emi201411x1.pdf [file emi201411x1.pdf]

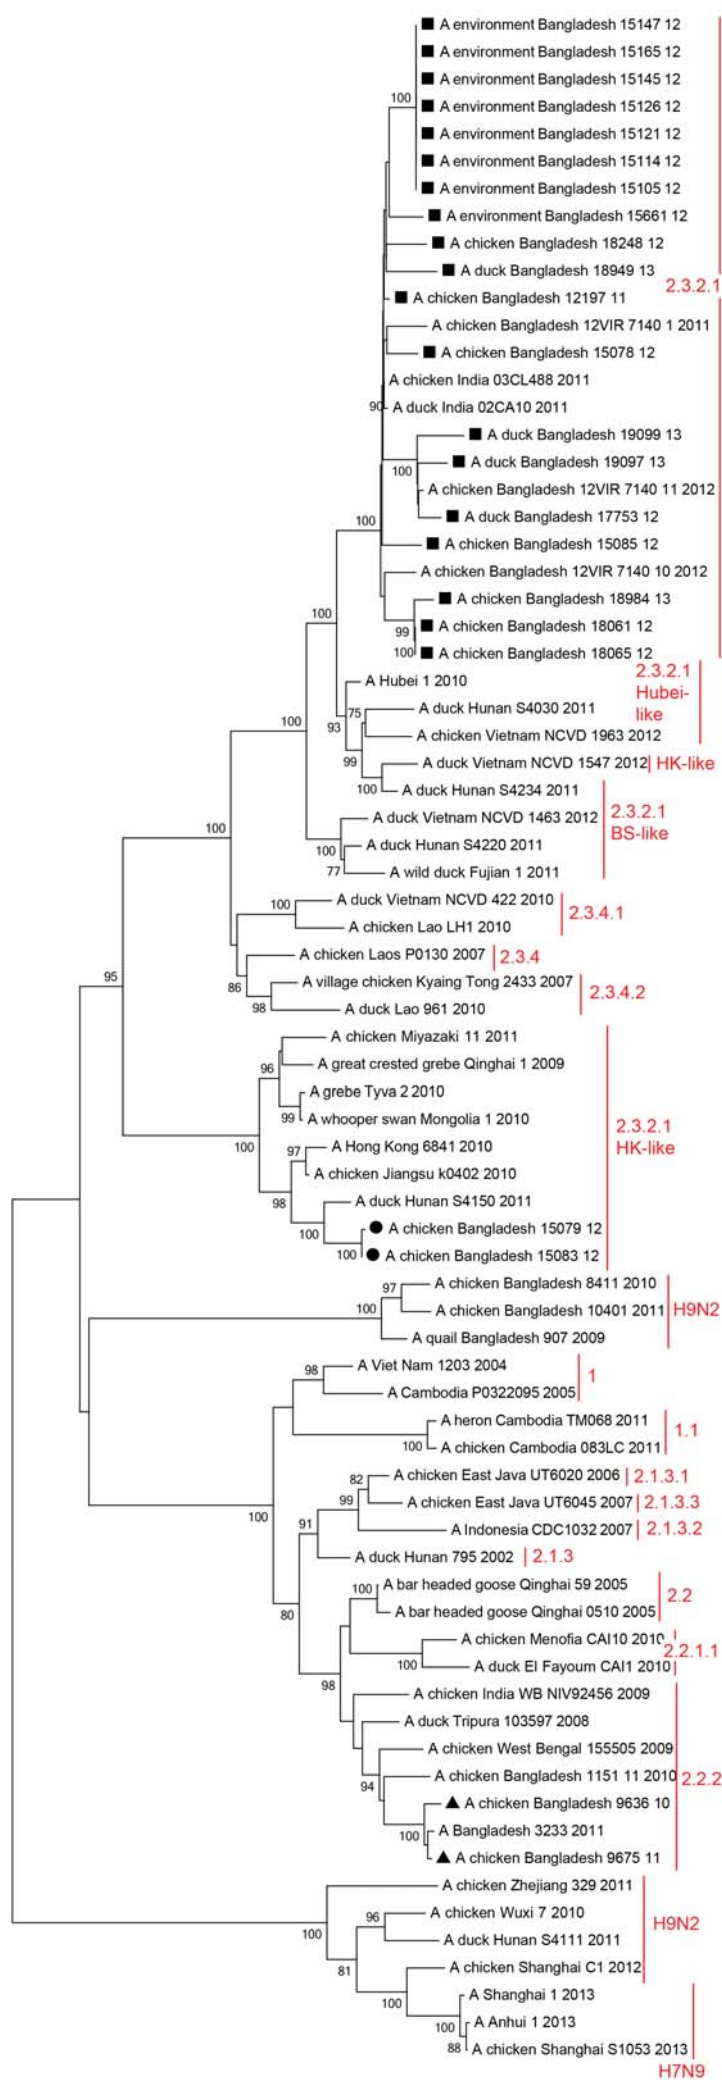

Supplement: emi201411x2.pdf [file emi201411x2.pdf]

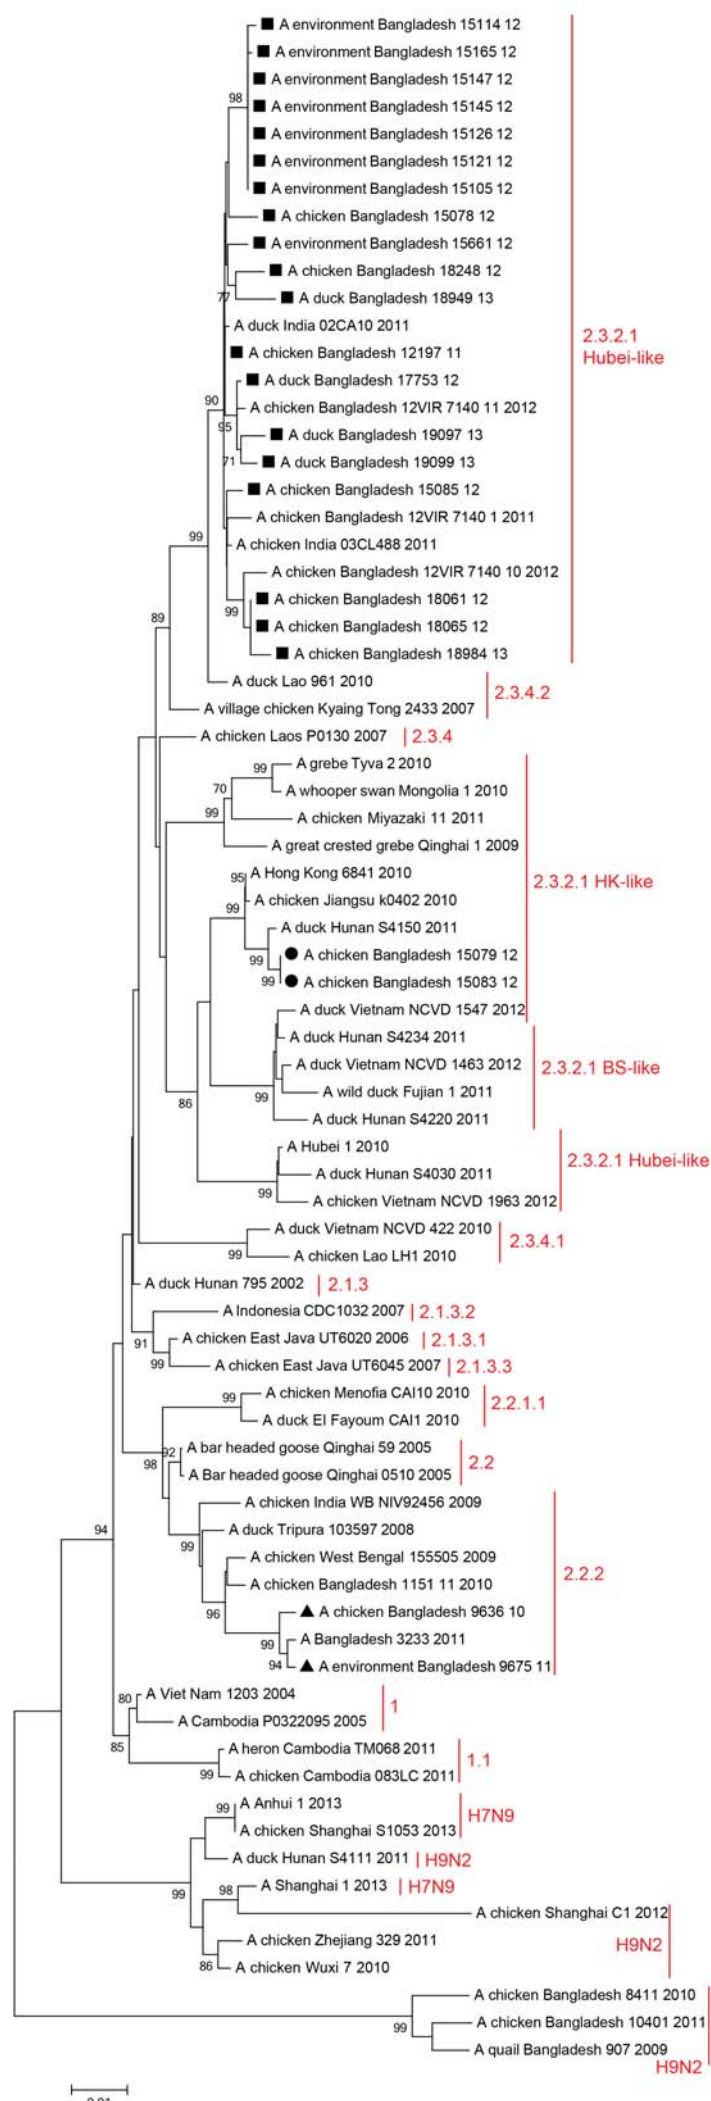

Supplement: emi201411x3.pdf [file emi201411x3.pdf]

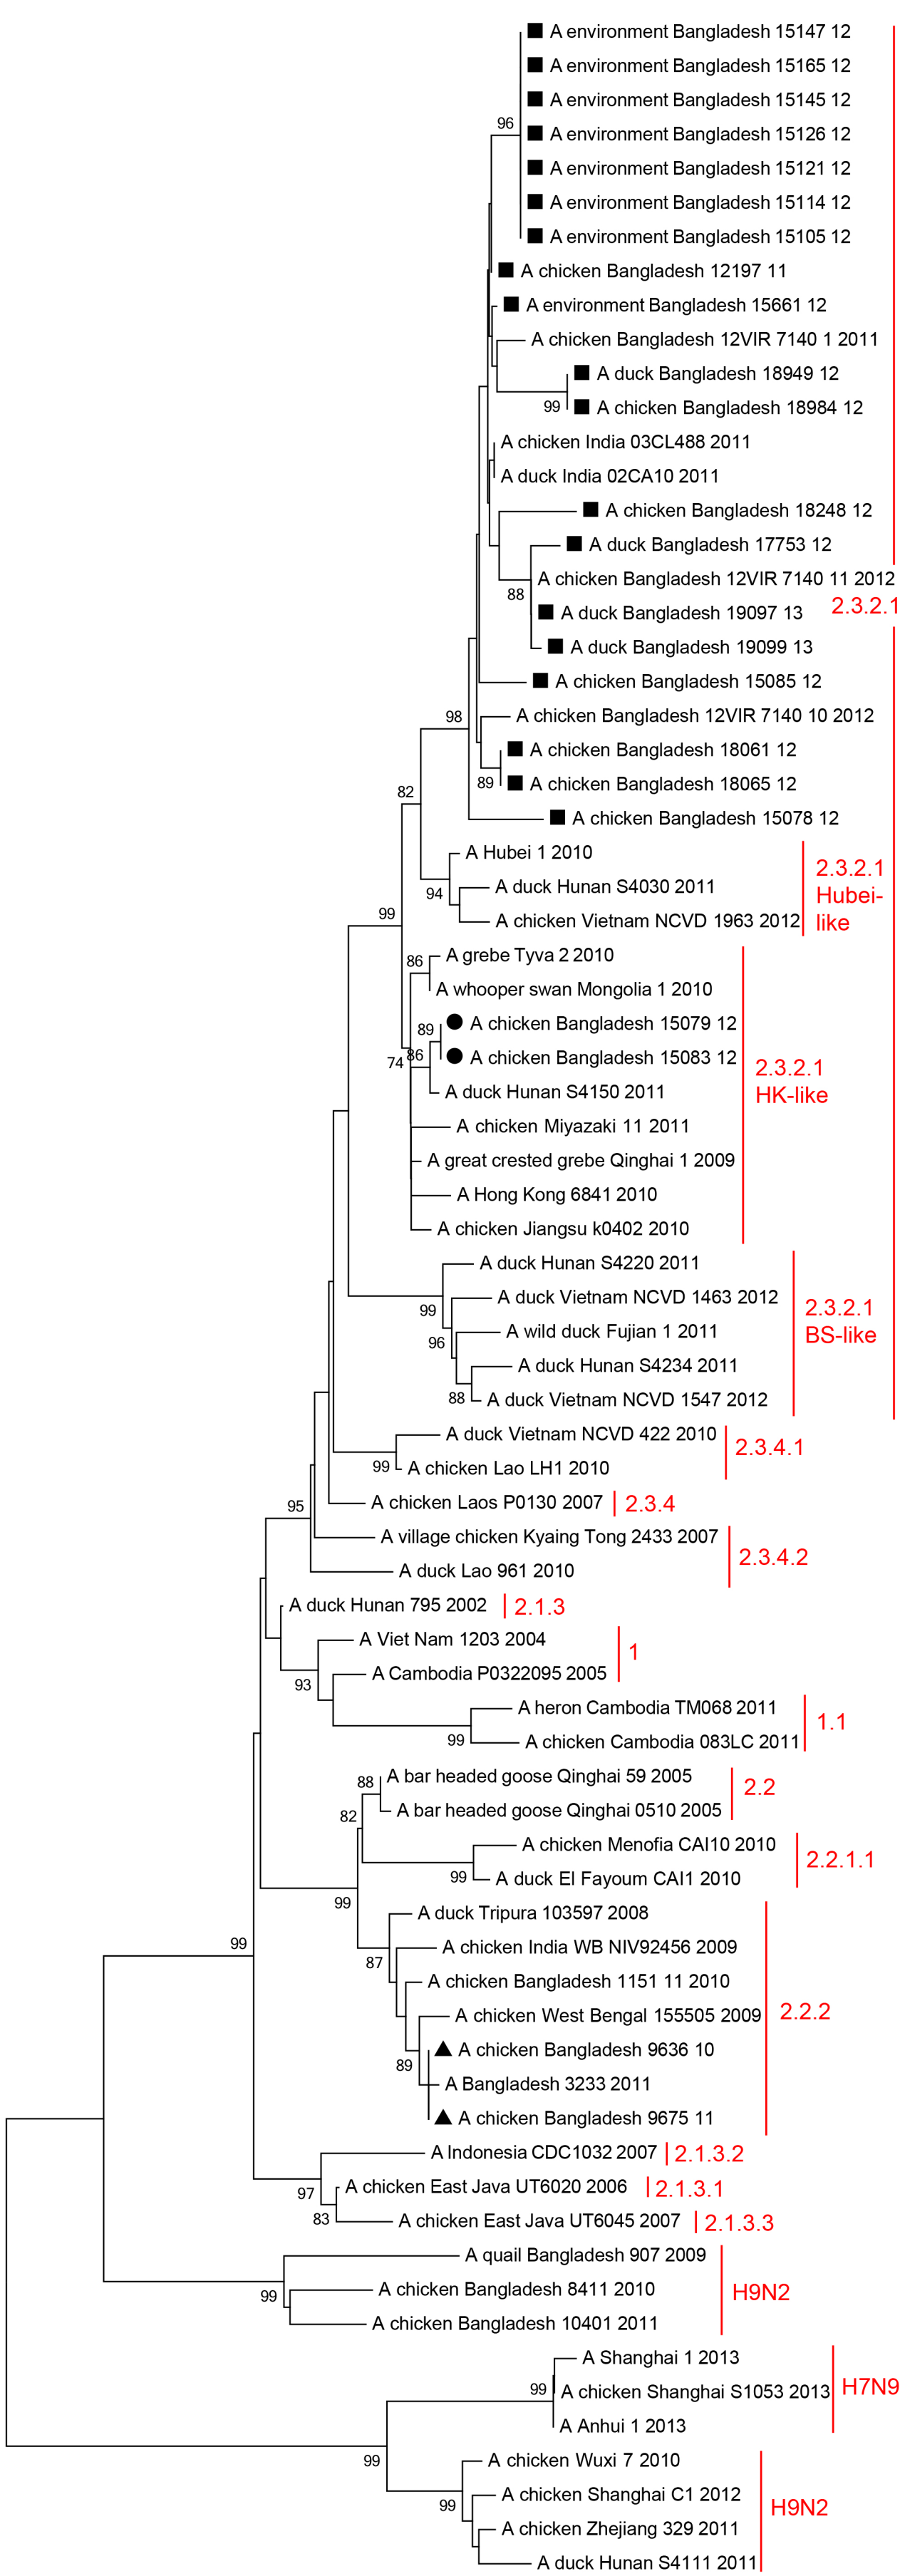

0.02

Supplement: emi201411x4.pdf [file emi201411x4.pdf]
